# Supplementary material for: Self-organized wrinkling patterns of a liquid crystalline polymer in surface wetting confinement
Source: Royal Society of Chemistry journal article supplement (doi:10.1039/c5sm00694e), 2015-01-01
Supplement: c5sm00694e1.pdf [file c5sm00694e1.pdf]

Supplementary Material (ESI) for Soft Matter  
This journal is (c) The Royal Society of Chemistry 2015

**Supporting Information for:**

## **Self-organized wrinkling patterns of liquid crystalline polymer in surface wetting confinement**

Jun-Hee Na,<sup>a†</sup> Se-Um Kim,<sup>a</sup> Youngjoo Sohn,<sup>b</sup> and Sin-Doo Lee<sup>a\*</sup>

<sup>a</sup> School of Electrical Engineering, Seoul National University, 1 Gwanak-ro, Gwanak-Gu, Seoul 151-744, South Korea.

<sup>b</sup> Department of Anatomy, College of Korean Medicine, Kyung Hee University, Seoul 130-701, South Korea.

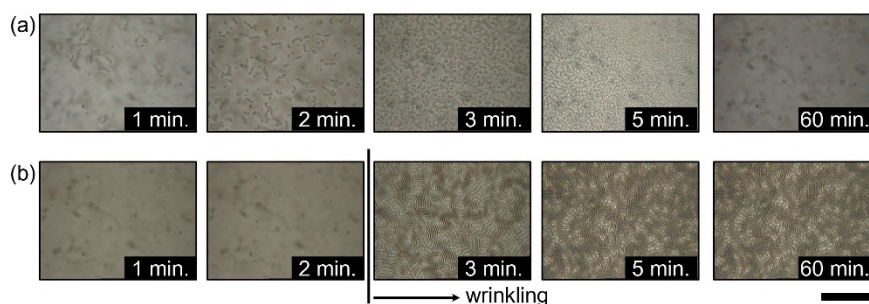

Figure S1. Wrinkle formation by UV irradiation.

The wrinkle formation was examined under different conditions of the UV irradiation. Microscopic images of the solidified RM films were shown as a function of the UV exposure time for two different values of the UV intensity: (a) 5 mW/cm<sup>2</sup> and (b) 100 mW/cm<sup>2</sup>. It was found that the even for the prolonged exposure time, essentially no wrinkle was formed at a low value of the UV intensity.

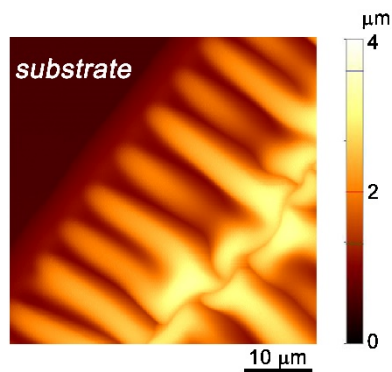

Figure S2. Image of fishbone wrinkles by atomic force microscopy.

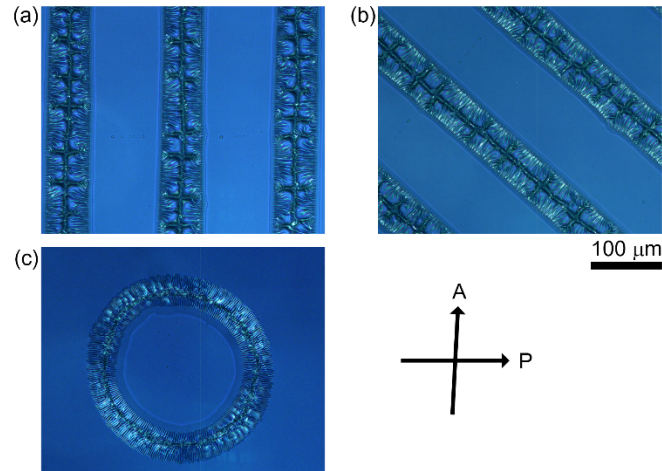

Figure S3. Birefringent patterns of the wrinkled structure

The birefringent patterns of the wrinkled structures in two different confinement geometries were observed under nearly crossed polarizers: (a) the striped confinement whose boundaries were parallel to the analyzer, (b) the striped confinement whose boundaries made an angle of  $45^\circ$  with respect to the analyzer, and (c) the ring-type confinement. Since the amount of the birefringence of a thin film (about  $0.5 \mu\text{m}$  in our case) was quite small, the angle between the analyzer (A) and the polarizer (P) in a polarizing optical microscope was set as  $87^\circ$  and the light source power was sufficiently high to observe the birefringent patterns.
